# Supplementary material for: Enhanced Photodecomposition of Methylene Blue in Water with Sr1−xKxTiO3−δ@PC-polyHIPEs under UV and Visible Light
Source: Hindawi journal article supplement (doi:10.1155/2018/9365147), 2018-01-01
Supplement: f1 [file 9365147.f1.docx]

Data of photocatalytic decomposition of MB for 160 min under visible light when

Sr1-xKxTiO3-δ@poly-HIPEs was used.
